# Supplementary material for: A planning model for dedicated tourist bus routes based on an improved genetic-greedy algorithm and machine learning
Source: PeerJ journal article supplement (doi:10.7717/peerj-cs.3221), 2025-09-30
Supplement: Supplemental_Files_1_Data.xlsx [file Supplemental_Files_1_Data.xlsx]

## Sheet: 1.Travel time survey
Travel Time Selection	Travel days	3	5	7	15	30	30+
	Vote count	5	22	82	34	5	2

## Sheet: 2.Travel Scope Survey
Travel Scope Selection	Travel scope	inside the city	Outside the city	Within and outside the city
	Vote count	43	15	92

## Sheet: 3.Scenic spot selection survey
Scenic spot selection	Scenic spots	Vote count
	The Potala Palace (A)	92
	The Jokhang Temple (B)	84
	Sera Monastery (C)	48
	Norbu Lingka (D)	61
	Lake Manasarovar (E)	47
	Namtso Lake (F)	86
	Yarlung Zangbo Daxiagu(G)	56
	Lhamo La-tso Lake (H)	53
	Migdui glacier (I)	39
	Zhada Earth Forest (J)	19
	Bartsuncuo (K)	78
	Migdui glacier (L)	72
	Mount Qomolangma (M)	69
	Guge Kingdom Ruins (N)	27
	Yamdrok Yumtso (O)	82
	Mount Kailash (P)	65

## Sheet: 4.Evaluation results
Initial Evaluation of Attractions by Tourists and Experts	Scenic spot indicators	Ticket	Motivation	Distance	Comfort	Degree of congestion	Accommodation
	The Potala Palace	85.23	92.17	75.99	77.92	68.34	72.88
	Namtso Lake	70.15	95.67	82.57	82.44	69.18	75.31
	The Jokhang Temple	60.92	91.13	78.91	79.67	72.55	80.4
	Yamdrok Yumtso	78.29	93.84	90.47	83.15	66.71	74.97
	Bartsuncuo	73.34	88.76	85.34	87.12	63.99	70.25
	Migdui glacier	55.47	90.32	91.72	81.49	60.1	68.28
	Mount Qomolangma	90.78	99.45	92.16	76.83	59.55	62.99
	Mount Kailash	68.64	89.12	96.85	73.84	67.5	69.29
	Norbu Lingka	72.09	83.52	80.23	85.17	64.63	78.36
	Yarlung Zangbo Daxiagu	77.18	94.25	98.772	86.88	58.77	71.64

## Sheet: 5.Route Indicator Survey
Route Distance Survey and Congestion Quantification Score	Origin/Destination	Destination/Origin	Distance(KM)	Degree of congestion
	The Potala Palace	Namtso Lake	80	3
	The Potala Palace	The Jokhang Temple	3	5
	The Potala Palace	Yamdrok Yumtso	100	4
	The Potala Palace	Bartsuncuo	140	3
	The Potala Palace	Mount Qomolangma	800	1
	The Potala Palace	Norbu Lingka	5	5
	The Potala Palace	Yarlung Zangbo Daxiagu	160	3
	Namtso Lake	The Jokhang Temple	85	1
	Namtso Lake	Yamdrok Yumtso	180	4
	Namtso Lake	Bartsuncuo	220	1
	Namtso Lake	Mount Qomolangma	900	1
	Namtso Lake	Norbu Lingka	110	3
	Namtso Lake	Yarlung Zangbo Daxiagu	245	1
	The Jokhang Temple	Yamdrok Yumtso	97	4
	The Jokhang Temple	Bartsuncuo	145	3
	The Jokhang Temple	Mount Qomolangma	800	1
	The Jokhang Temple	Norbu Lingka	3	5
	The Jokhang Temple	Yarlung Zangbo Daxiagu	165	3
	Yamdrok Yumtso	Bartsuncuo	80	3
	Yamdrok Yumtso	Mount Qomolangma	800	1
	Yamdrok Yumtso	Norbu Lingka	100	3
	Yamdrok Yumtso	Yarlung Zangbo Daxiagu	145	3
	Bartsuncuo	Mount Qomolangma	880	1
	Bartsuncuo	Norbu Lingka	140	3
	Bartsuncuo	Yarlung Zangbo Daxiagu	210	1
	Mount Qomolangma	Norbu Lingka	800	1
	Mount Qomolangma	Yarlung Zangbo Daxiagu	800	3
	Norbu Lingka	Yarlung Zangbo Daxiagu	160	3

## Sheet: 6.Route Evaluation Survey
Method 1:Comparison of Voting Results on Tourist Preferences for Six Routes Across Different Travel Times"	Travel itinerary Travel days	3	5	7	15	30
	A	6	5	3	2	1
	B	5	4	4	3	2
	C	4	4	3	2	1
	D	3	7	16	20	24
	E	7	5	2	1	2
	F	5	3	2	2	0
