# Supplementary material for: A planning model for dedicated tourist bus routes based on an improved genetic-greedy algorithm and machine learning
Source: PeerJ journal article supplement (doi:10.7717/peerj-cs.3221), 2025-09-30
Supplement: Table_S2.docx [file Table_S2.docx]

**Table S2.** AHP judgment matrix

| **norm** | **Ticket** | **Motivation** | **Distance** | **Comfort** | **Degree of congestion** | **Accommodation** |
| --- | --- | --- | --- | --- | --- | --- |
| Ticket | 0.1382 | 0.1438 | 0.1360 | 0.1314 | 0.1403 | 0.1392 |
| Motivation | 0.1842 | 0.1382 | 0.1579 | 0.1579 | 0.1934 | 0.1382 |
| Distance | 0.1776 | 0.1209 | 0.1382 | 0.1382 | 0.1727 | 0.1382 |
| Comfort | 0.1776 | 0.1209 | 0.1382 | 0.1382 | 0.1579 | 0.1228 |
| Degree of congestion | 0.1382 | 0.0987 | 0.1105 | 0.1209 | 0.1382 | 0.1036 |
| Traffic | 0.1842 | 0.1382 | 0.1382 | 0.1554 | 0.1842 | 0.1382 |

Note: Maximum characteristic root:. Consistency test indicator: .
