# Supplementary material for: A planning model for dedicated tourist bus routes based on an improved genetic-greedy algorithm and machine learning
Source: PeerJ journal article supplement (doi:10.7717/peerj-cs.3221), 2025-09-30
Supplement: Table_S3.docx [file Table_S3.docx]

**Table S3.** Results of AHP subjective weight calculation

| **norm** | **weight vector** | **Subjective weights** |
| --- | --- | --- |
| Ticket | 0.84 | 0.139 |
| Motivation | 1.16 | 0.192 |
| Distance | 1.06 | 0.175 |
| Comfort | 1.02 | 0.169 |
| Degree of congestion | 0.85 | 0.14 |
| Accommodation | 1.12 | 0.185 |
