# Supplementary material for: A planning model for dedicated tourist bus routes based on an improved genetic-greedy algorithm and machine learning
Source: PeerJ journal article supplement (doi:10.7717/peerj-cs.3221), 2025-09-30
Supplement: Table_S4.docx [file Table_S4.docx]

**Table S4.** Determination of objective weights for entropy weighting method.

|  | **Ticket** | **Motivation** | **Distance** | **Comfort** | **Degree of congestion** | **Accommodation** |
| --- | --- | --- | --- | --- | --- | --- |
| **weights** | 0.260 | 0.121 | 0.196 | 0.144 | 0.154 | 0.126 |
