# Supplementary material for: A planning model for dedicated tourist bus routes based on an improved genetic-greedy algorithm and machine learning
Source: PeerJ journal article supplement (doi:10.7717/peerj-cs.3221), 2025-09-30
Supplement: Table_S5.docx [file Table_S5.docx]

**Table S5.** Determination of portfolio weights

| **Norm: weights** | **Ticket** | **Motivation** | **Distance** | **Comfort** | **Degree of congestion** | **Accommodation** |
| --- | --- | --- | --- | --- | --- | --- |
| **AHP weighting** | 0.139 | 0.192 | 0.175 | 0.169 | 0.14 | 0.185 |
| **entropy weighting** | 0.26 | 0.121 | 0.196 | 0.144 | 0.154 | 0.126 |
| **Portfolio weights** | 0.1901 | 0.1524 | 0.1852 | 0.156 | 0.1468 | 0.1527 |
