# Supplementary material for: A planning model for dedicated tourist bus routes based on an improved genetic-greedy algorithm and machine learning
Source: PeerJ journal article supplement (doi:10.7717/peerj-cs.3221), 2025-09-30
Supplement: Table_S7.docx [file Table_S7.docx]

**Table S7.** Summary of attraction ratings

| **place of interest (tourism)** | **evaluation score** | **rankings** |
| --- | --- | --- |
| The Potala Palace | 0.1101 | 2 |
| Namtso Lake | 0.1055 | 5 |
| The Jokhang Temple | 0.0919 | 8 |
| Yamdrok Yumtso | 0.1015 | 7 |
| Bartsuncuo | 0.1024 | 6 |
| Migdui glacier | 0.0727 | 9 |
| Mount Qomolangma | 0.1400 | 1 |
| Kangrinboqe | 0.0452 | 10 |
| Norbu Lingka | 0.1078 | 3 |
| Yarlung Zangbo Daxiagu | 0.1060 | 4 |
