# Supplementary material for: A planning model for dedicated tourist bus routes based on an improved genetic-greedy algorithm and machine learning
Source: PeerJ journal article supplement (doi:10.7717/peerj-cs.3221), 2025-09-30
Supplement: Table_S8.docx [file Table_S8.docx]

**Table S8.** F1-Score report of our method and competitive methods.

| Test | Adaboost | SVM |
| --- | --- | --- |
| 1 | 87.2% | 88.5% |
| 2 | 85.0% | 89.2% |
| 3 | 83.8% | 87.8% |
| 4 | 84.7% | 88.9% |
| ß5 | 85.5% | 89.5% |
| 6 | 84.3% | 88.3% |
| 7 | 85.2% | 89.1% |
| 8 | 83.9% | 87.7% |
| 9 | 84.6% | 88.6% |
| 10 | 85.4% | 89.3% |
