# Supplementary material for: A planning model for dedicated tourist bus routes based on an improved genetic-greedy algorithm and machine learning
Source: PeerJ journal article supplement (doi:10.7717/peerj-cs.3221), 2025-09-30
Supplement: Table_S9.docx [file Table_S9.docx]

**Table S9.** Recall report of our method and competitive methods.

| Test | Adaboost | SVM |
| --- | --- | --- |
| 1 | 81.5% | 85.0% |
| 2 | 82.3% | 86.3% |
| 3 | 80.9% | 84.7% |
| 4 | 82.1% | 85.9% |
| 5 | 83.0% | 87.1% |
| 6 | 81.7% | 85.5% |
| 7 | 82.6% | 86.8% |
| 8 | 81.2% | 84.9% |
| 9 | 82.0% | 85.7% |
| 10 | 83.2% | 86.5% |
