# Supplementary material for: A planning model for dedicated tourist bus routes based on an improved genetic-greedy algorithm and machine learning
Source: PeerJ journal article supplement (doi:10.7717/peerj-cs.3221), 2025-09-30
Supplement: Table_S11.docx [file Table_S11.docx]

**Table S11.** Scenery evaluation and ranking results

|  | Sub 10%; Obj 90% | | Sub 50%; Obj 50% | | Sub 90%; Obj 10% | | Ours | |
| --- | --- | --- | --- | --- | --- | --- | --- | --- |
| **Score** | **Rank** | **Score** | **Rank** | **Score** | **Rank** | **Score** | **Rank** |
| Mount Everest | 0.1690 | 1 | 0.1582 | 1 | 0.1474 | 1 | 0.1400 | 1 |
| Norbulingka | 0.1226 | 2 | 0.1254 | 2 | 0.1282 | 2 | 0.1078 | 3 |
| Potala Palace | 0.1145 | 3 | 0.1122 | 3 | 0.1100 | 4 | 0.1101 | 2 |
| Yarlung Tsangpo Grand Canyon | 0.1060 | 4 | 0.1079 | 4 | 0.1097 | 5 | 0.1060 | 4 |
| Basum Lake | 0.1043 | 5 | 0.1042 | 6 | 0.1041 | 8 | 0.1024 | 6 |
| Namtso Lake | 0.1033 | 6 | 0.1070 | 5 | 0.1107 | 3 | 0.1055 | 5 |
| Yamdrok Lake | 0.1015 | 7 | 0.1033 | 7 | 0.1052 | 6 | 0.1015 | 7 |
| Midui Glacier | 0.0981 | 8 | 0.0974 | 9 | 0.0966 | 9 | 0.0727 | 9 |
| Jokhang Temple | 0.0950 | 9 | 0.0996 | 8 | 0.1042 | 7 | 0.0919 | 8 |
| Mount Kailash | 0.0663 | 10 | 0.0665 | 10 | 0.0668 | 10 | 0.0452 | 10 |
